# Supplementary material
Source: MDPI journal article supplement (https://www.mdpi.com/2571-6255/6/1/27)
Supplement: s1 [file s1]

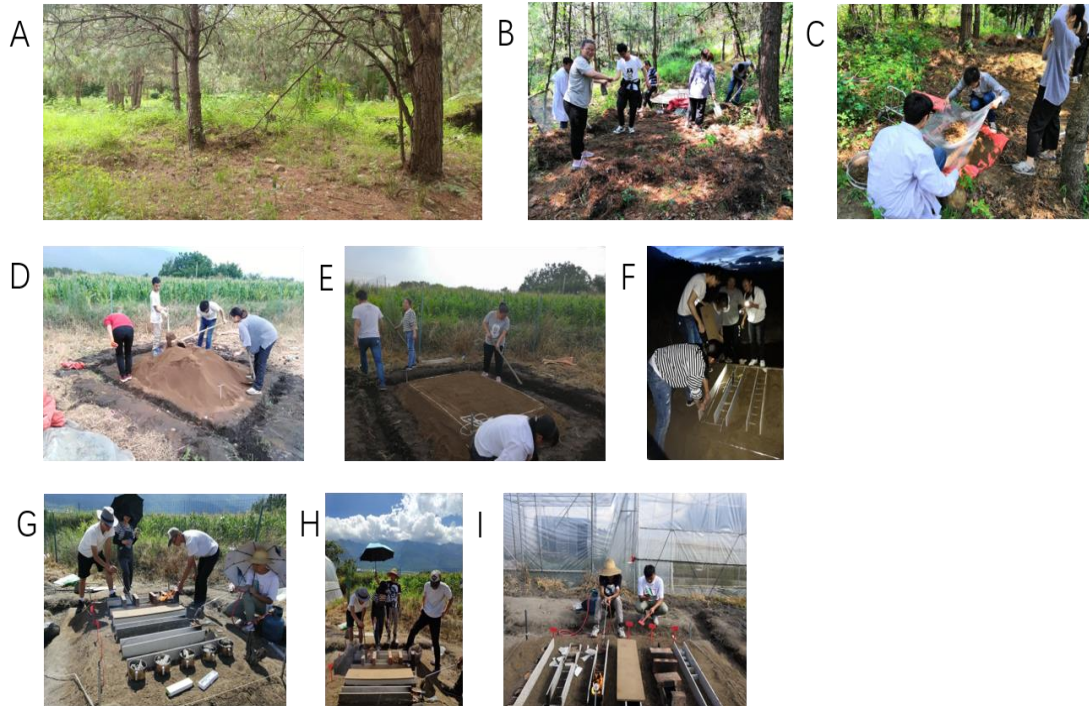

**Figure S1.** Study site and treatment. (A) Yunnan pine forest where the surface soil was collected. (B) collecting soil. (C) Seiving soil through a 20 mesh screen; (D) preparing the experimental plot using sieved soil. (E) building drainage canals for the experimental plot; (F) separating the experimental plot by heat-resistant bricks; (G) charcoal treatment in which 200 g of smoldering charcoal was placed in a thin iron box and left on the soil quadrats for one hour; (H) natural burning treatment in which dry pine needles was placed on the soil surface and burned; (I) treatment with flame gun.

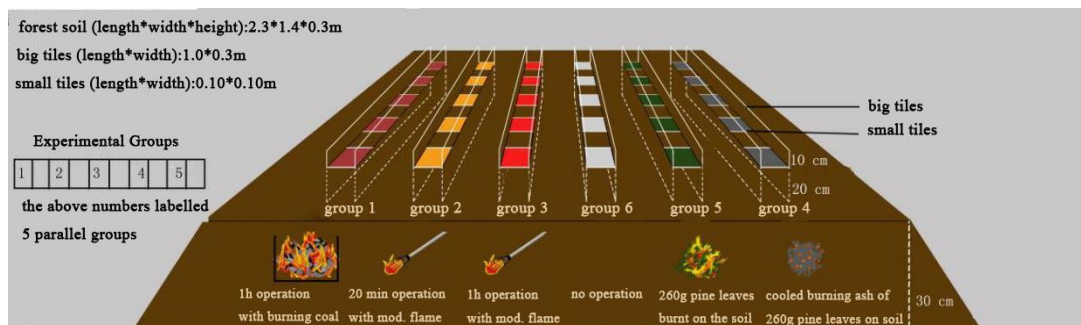

**Figure S2.** Drawing of the experimental plot illustrating how the various treatments are arranged.

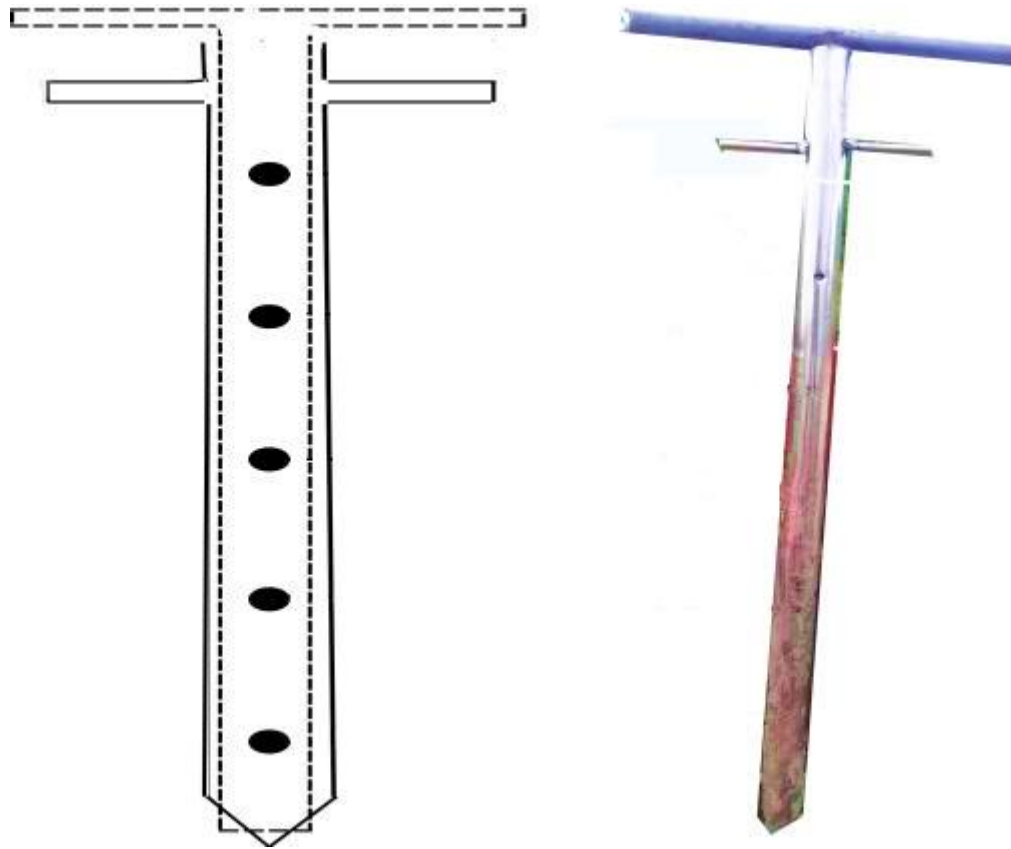

**Figure S3.** Handmade soil sampler (left: sketch, right: picture).

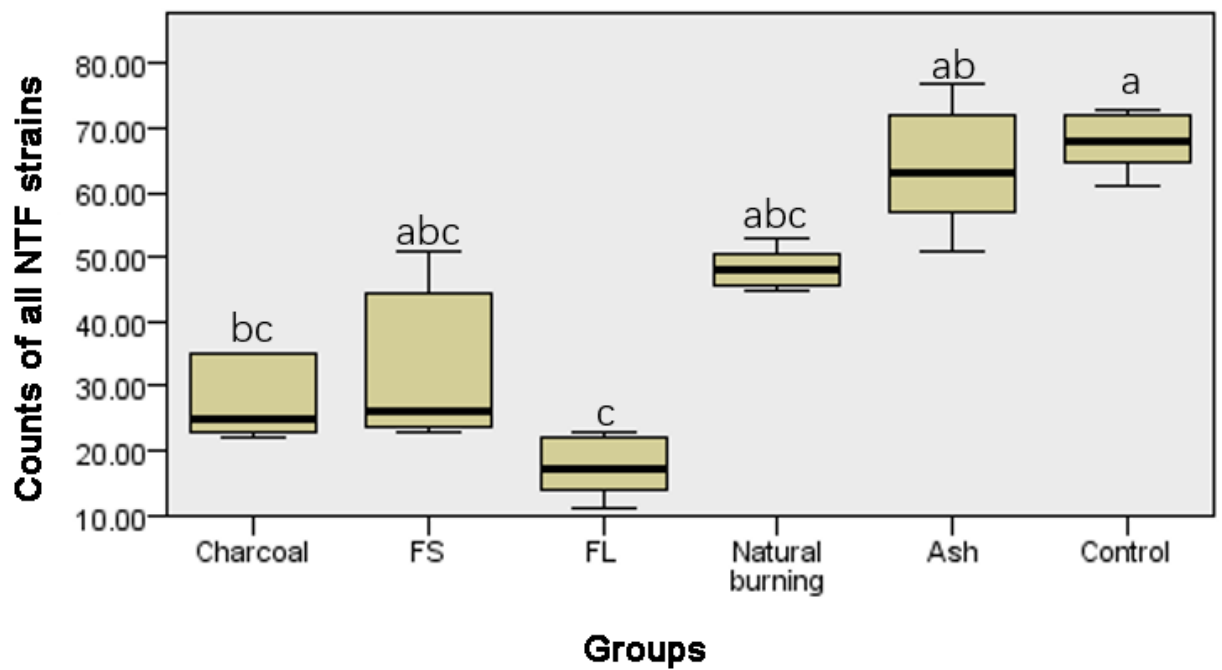

**Figure S4.** Counts of all nematode-trapping fungi (NTF) strains in each group. Error bars show the SD of the absolute values. Different letters above the bars indicate statistically significant variations ( $p < 0.05$ ). FS: treated with flame gun and the burn duration was 20 min; FL: treated with flame gun and the burn duration was 60 min; Charcoal: treated with Charcoal; Ash: treated with cooled ash; Natural burning: treated

with dry pine needles placed directly on the soil and let burn naturally and ashes were left on the soil after burn; Control: without any treatment

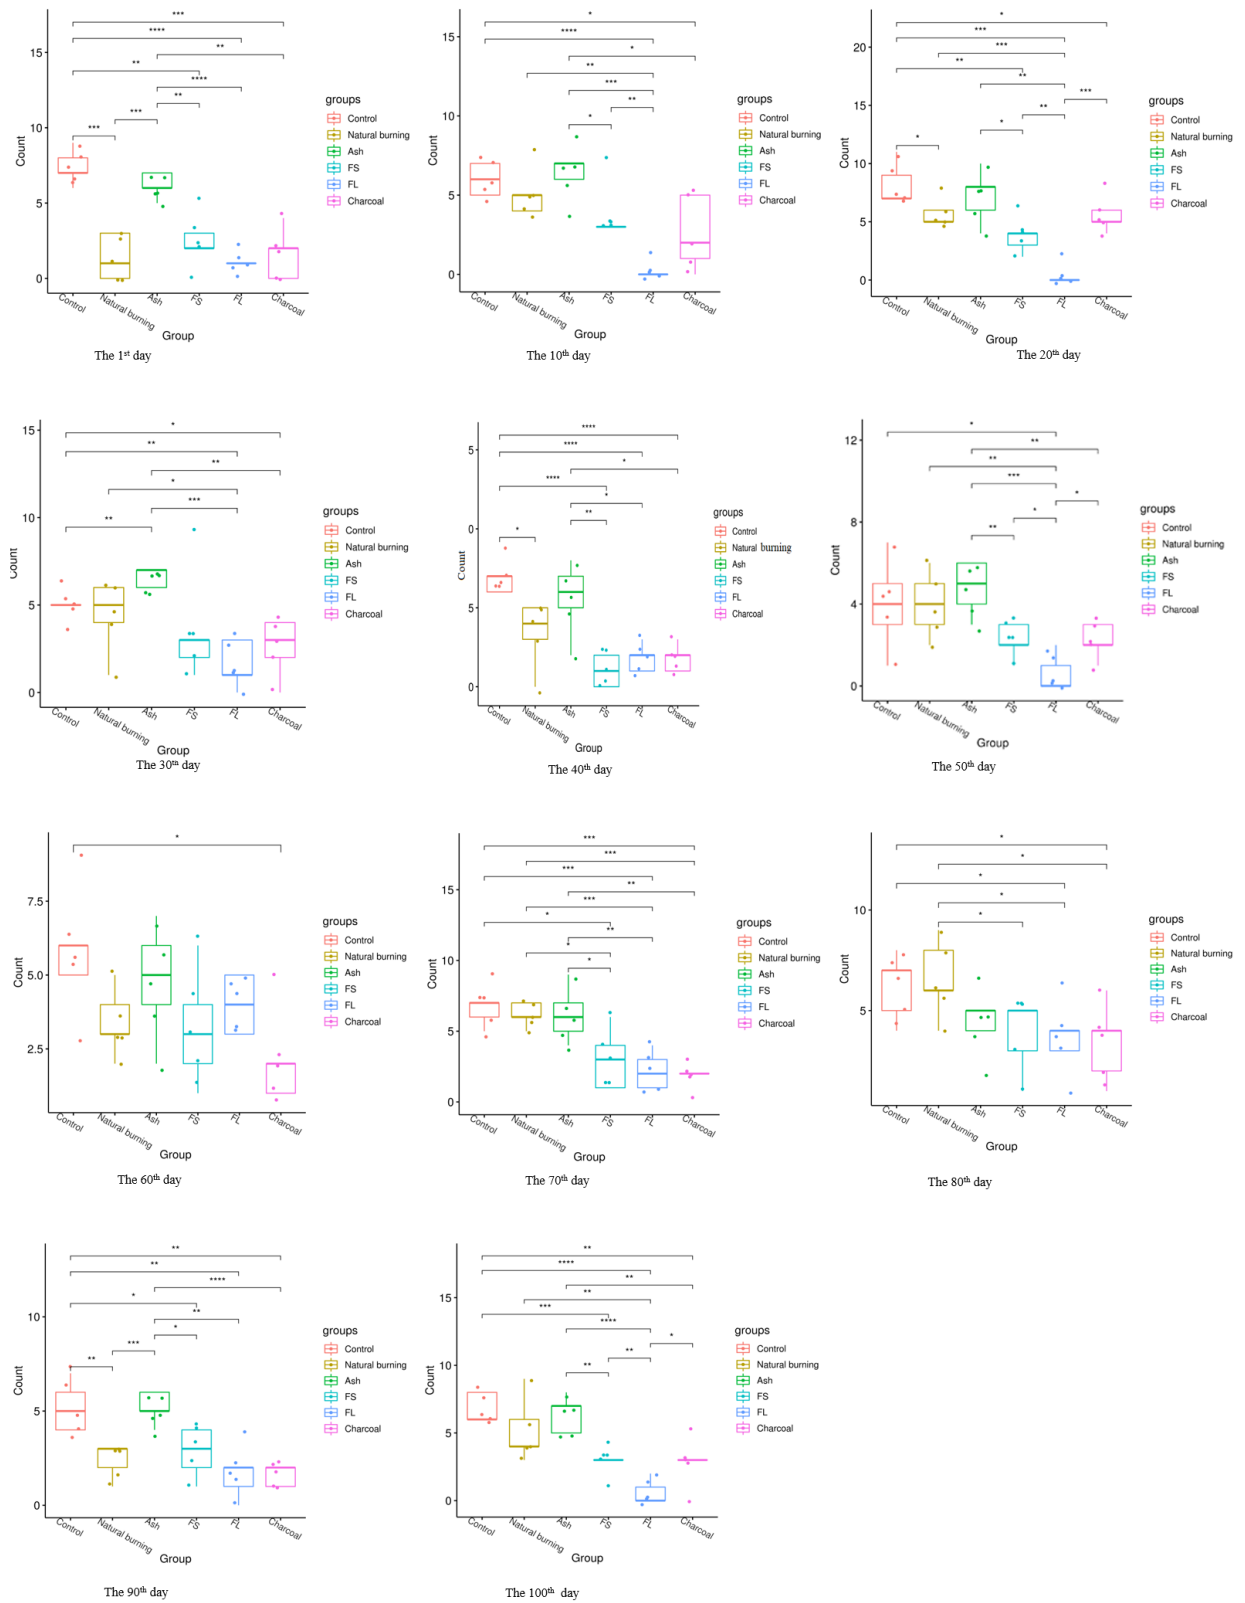

**Figure S5.** Difference in the counts of all nematode-trapping fungi (NTF) strains among groups at each time point with t test. \*:  $p < 0.05$ ; \*\*:  $p < 0.01$ ; \*\*\*:  $p < 0.001$ ; \*\*\*\*:  $p < 0.0001$ . FS: treated with flame gun and the burn

duration was 20 min; FL: treated with flame gun and the burn duration was 60 min; Charcoal: treated with Charcoal; Ash: treated with cooled ash; Natural burning: treated with dry pine needles placed directly on the soil and let burn naturally and ashes were left on the soil after burn; Control: without any treatment.

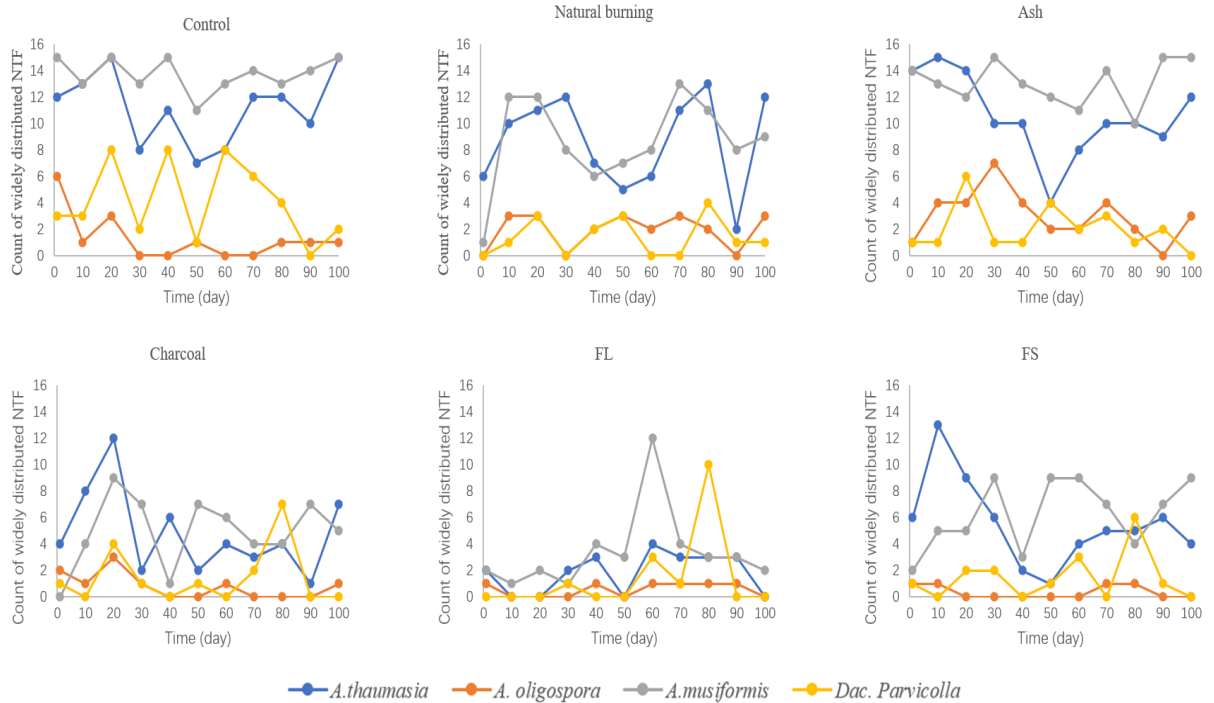

**Figure S6.** Variation over time in the counts of widely distributed species. FS: treated with flame gun and the burn duration was 20 min; FL: treated with flame gun and the burn duration was 60 min; Charcoal: treated with Charcoal; Ash: treated with cooled ash; Natural burning: treated with dry pine needles placed directly on the soil and let burn naturally and ashes were left on the soil after burn; Control: without any treatment.

**Table S1.** Soil physicochemical properties of each group at the three time points.

| Time | Group           | pH              | Moisture        | OM              | TN             | TP               |
|------|-----------------|-----------------|-----------------|-----------------|----------------|------------------|
| D1   | FL              | 4.36 ± 0.03 ab  | 8.26 ± 0.05 ab  | 95.99 ± 0.99 c  | 3.92 ± 0.05 c  | 225.97 ± 1.68 e  |
| D1   | FS              | 4.32 ± 0.025 ab | 8.49 ± 0.01 ab  | 106.21 ± 1.58 b | 4.50 ± 0.10 ab | 238.71 ± 4.10 d  |
| D1   | Charcoal        | 4.42 ± 0.02 ab  | 6.14 ± 0.01 b   | 96.09 ± 2.14 c  | 4.59 ± 0.10 ab | 484.09 ± 5.40 c  |
| D1   | Ash             | 4.79 ± 0.02 a   | 12.09 ± 0.08 a  | 115.10 ± 3.16 a | 4.70 ± 0.21 a  | 636.80 ± 4.95 a  |
| D1   | Natural burning | 4.80 ± 0.01 a   | 10.35 ± 0.13 ab | 105.96 ± 2.58 b | 4.61 ± 0.10 ab | 641.67 ± 6.51 a  |
| D1   | Control         | 4.24 ± 0.02 b   | 12.05 ± 0.05 a  | 111.06 ± 2.75 a | 4.42 ± 0.20 b  | 529.18 ± 3.84 b  |
| D50  | FL              | 4.42 ± 0.02 ab  | 33.82 ± 0.08 b  | 92.87 ± 0.81 b  | 3.46 ± 0.05 c  | 519.82 ± 1.74 b  |
| D50  | FS              | 4.43 ± 0.04 ab  | 35.20 ± 0.21 ab | 93.61 ± 1.51 b  | 3.55 ± 0.08 c  | 520.22 ± 8.34 b  |
| D50  | Charcoal        | 4.53 ± 0.03 ab  | 35.79 ± 0.08 ab | 96.50 ± 1.80 b  | 3.79 ± 0.19 b  | 559.51 ± 5.28 a  |
| D50  | Ash             | 5.48 ± 0.01 a   | 41.56 ± 0.49 a  | 111.90 ± 2.47 a | 4.12 ± 0.14 a  | 766.29 ± 17.94 a |
| D50  | Natural burning | 5.03 ± 0.04 ab  | 36.33 ± 0.58 ab | 108.81 ± 4.23 a | 3.61 ± 0.12 bc | 666.16 ± 4.80 a  |
| D50  | Control         | 4.31 ± 0.02 b   | 37.62 ± 1.46 ab | 95.58 ± 2.91 b  | 3.62 ± 0.13 bc | 736.88 ± 11.63 a |
| D100 | FL              | 4.40 ± 0.00 b   | 35.42 ± 0.37 e  | 100.94 ± 0.92 c | 3.73 ± 0.06 b  | 516.29 ± 5.78 d  |
| D100 | FS              | 4.41 ± 0.03 ab  | 37.32 ± 0.39 c  | 106.62 ± 1.47 b | 3.62 ± 0.13 b  | 595.20 ± 5.37 c  |
| D100 | Charcoal        | 4.42 ± 0.01 ab  | 36.98 ± 0.08 d  | 101.96 ± 2.57 c | 3.97 ± 0.06 a  | 509.65 ± 8.59 d  |
| D100 | Ash             | 5.19 ± 0.02 a   | 44.06 ± 0.11 a  | 119.17 ± 3.82 a | 4.09 ± 0.10 a  | 705.42 ± 9.39 a  |

|      |                 |                |                |                  |               |                 |
|------|-----------------|----------------|----------------|------------------|---------------|-----------------|
| D100 | Natural burning | 4.78 ± 0.02 ab | 39.76 ± 0.20 b | 104.85 ± 2.40 bc | 3.58 ± 0.08 b | 610.15 ± 5.23 b |
| D100 | Control         | 4.42 ± 0.03 ab | 40.50 ± 0.50 a | 106.12 ± 1.18 b  | 3.74 ± 0.21 b | 462.31 ± 2.05 e |

Note: Values are Mean ± standard error (n = 3); Different lowercase letters within the same line denote significant differences ( $p < 0.05$ ) between treatments at the same time point. FS: treated with flame gun and the burn duration was 20 min; FL: treated with flame gun and the burn duration was 60 min; Charcoal: treated with Charcoal; Ash: treated with cooled ash; Natural burning: treated with dry pine needles placed directly on the soil and let burn naturally and ashes were left on the soil after burn; Control: without any treatment.

**Table S2.** The peak temperature at a depth of 5 cm in different groups.

| Group Code      | Peak Temperature (°C) |
|-----------------|-----------------------|
| FL              | 402                   |
| FS              | 356                   |
| Charcoal        | 342                   |
| Ash             | 28                    |
| Natural burning | 131                   |
| Control         | 28                    |

Note: FS: treated with flame gun and the burn duration was 20 min; FL: treated with flame gun and the burn duration was 60 min; Charcoal: treated with Charcoal; Ash: treated with cooled ash; Natural burning: treated with dry pine needles placed directly on the soil and let burn naturally and ashes were left on the soil after burn; Control: without any treatment.

**Table S3.** Simple effects of soil Physicochemical properties on nematode-trapping fungi (NTF) communities.

| Physicochemical Property | Explains(%) | Pseudo-F | <i>p</i> |
|--------------------------|-------------|----------|----------|
| OM                       | 43.6        | 12.3     | 0.002    |
| TN                       | 22.9        | 4.7      | 0.022    |
| TP                       | 14.9        | 2.8      | 0.080    |
| pH                       | 9.4         | 1.7      | 0.216    |
| MC                       | 5.3         | 0.9      | 0.400    |

Note: OM: Organic matter; TN: Total nitrogen; TP: Total phosphorus; MC: Moisture content.
